# Supplementary material for: Fe-doped Cu-based bimetallic metal–organic frameworks as nanoscale microwave sensitizers for enhancing microwave thermal and dynamic therapy for hepatocellular carcinoma
Source: Royal Society of Chemistry journal article supplement (doi:10.1039/d4nr00654b), 2024-01-01
Supplement: d4nr00654b1.pdf [file d4nr00654b1.pdf]

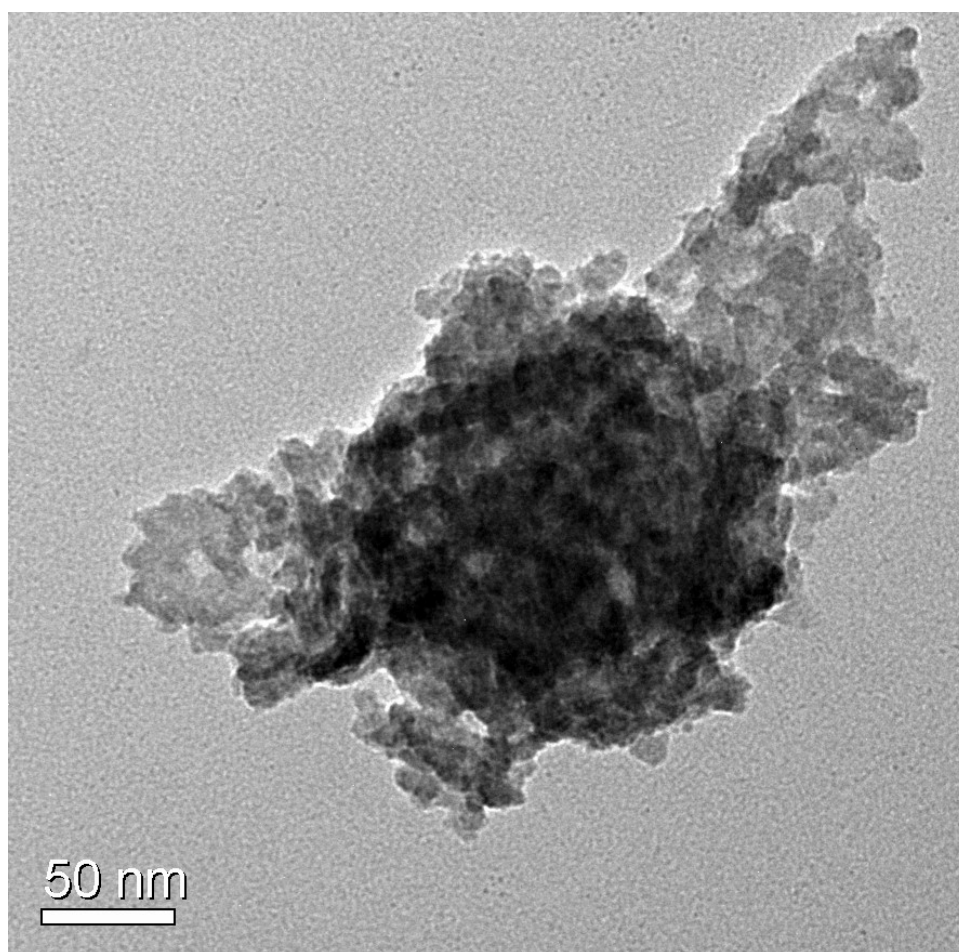

2 **Figure S1** TEM image of the FCM nanoparticles oscillated at pH 5.0 for 24 h.

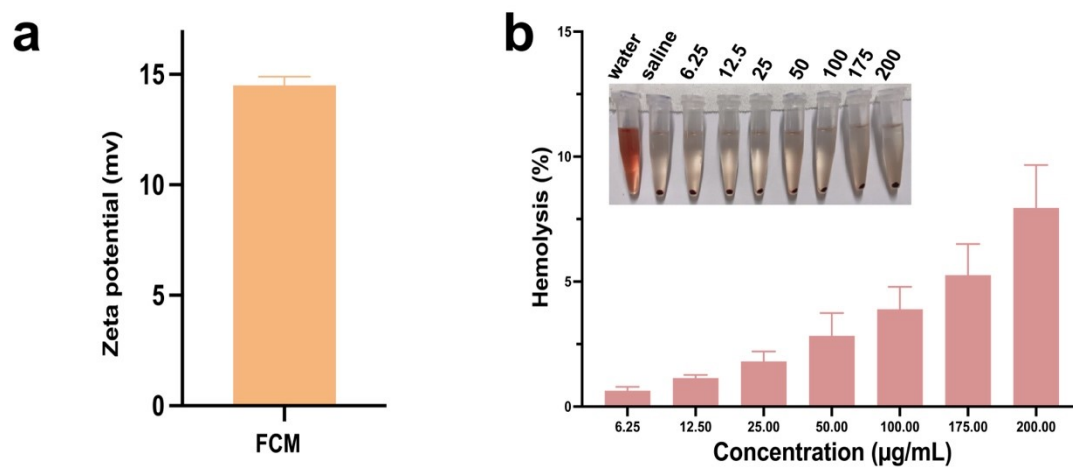

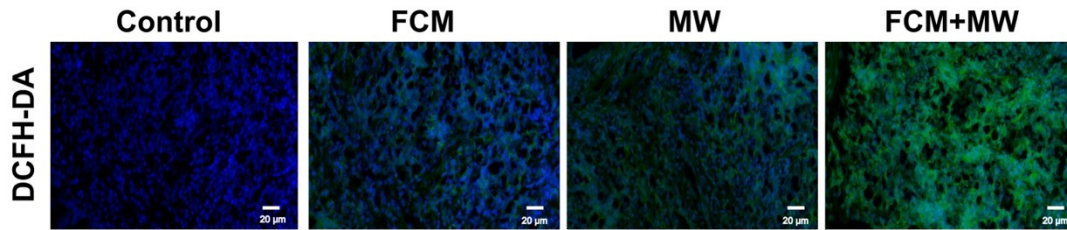

7

8 **Figure S3** DCFH-DA staining images of tumor tissue sections obtained from H22

9 BALB/c mice with various treatments. (Scale bar: 20  $\mu\text{m}$ ).

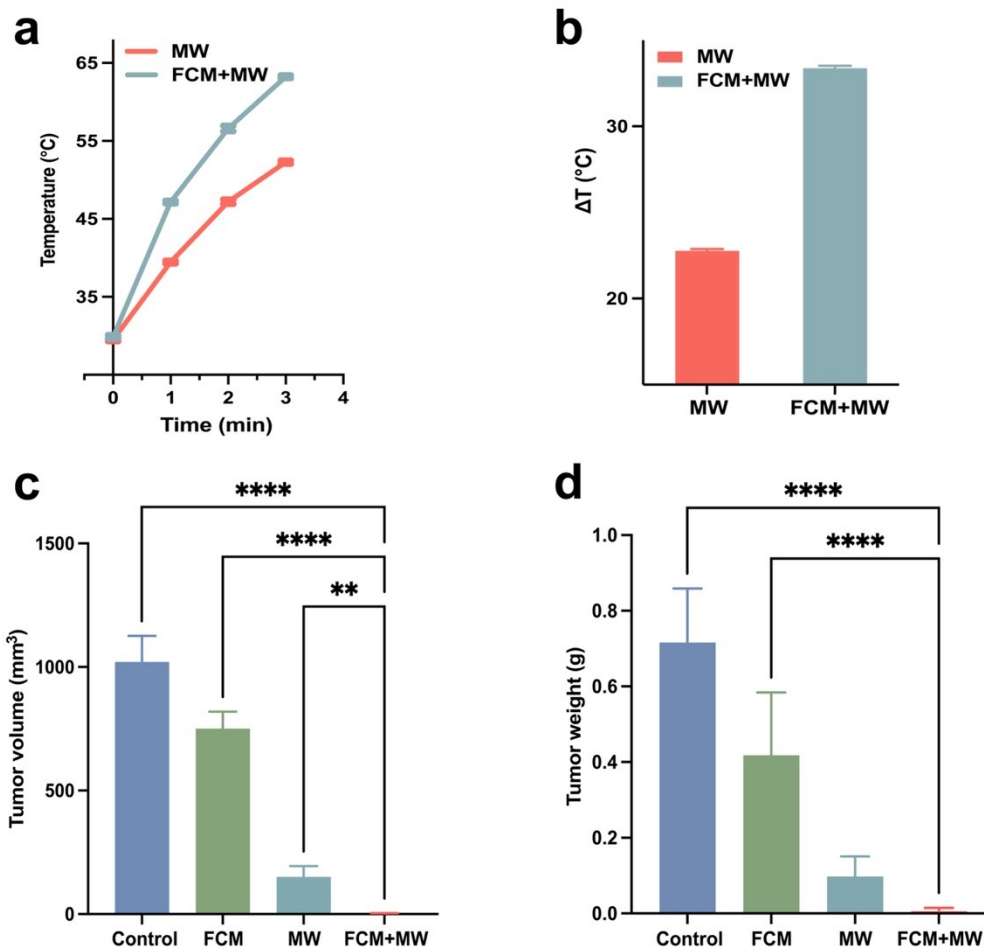

10

11 **Figure S4** (a, b) Corresponding temperature increase curves and temperature change

12 values at the tumor site upon exposure to microwave irradiation for 3 min. (c, d) Tumor

13 volume and tumor weight of mice after treatment (\*\*P < 0.01, \*\*\*\*P < 0.0001).

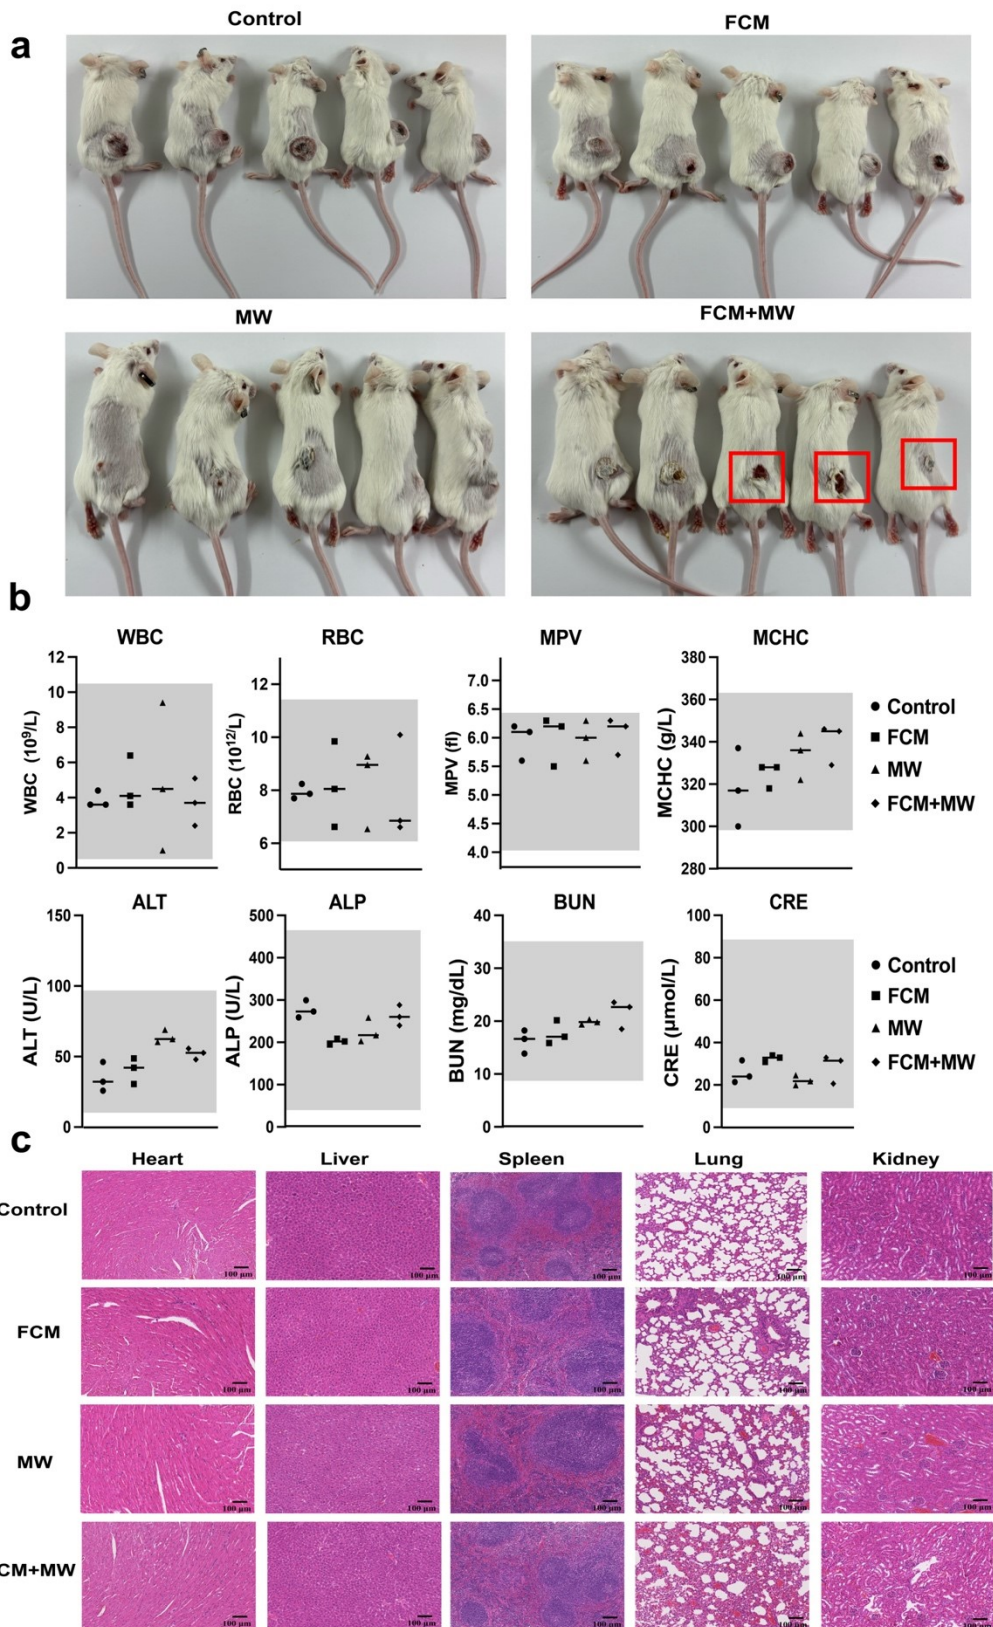

14

15 **Figure S5 (a)** In vivo antitumor efficacy of FCM nanoparticles on H22 BALB/c mice.

16 (b) Blood routine and blood biochemical data were obtained from mice after two weeks

17 of treatment (n=3). (The gray zone represents the normal interval). (c) H&E staining  
18 images of tumor tissue and other major organs after treatment in the different groups  
19 (scale bar: 100  $\mu$ m).

20

21 **Acknowledgments:** The present study was supported by the National Natural Science  
22 Foundation of China (grant no. 81901855), the Natural Science Foundation of Jiangsu  
23 Province (grant no. BK20181087), the Jiangsu Planned Projects for Postdoctoral  
24 Research Funds (grant no. 2020Z069), and the Jiangsu Province Capability  
25 Improvement Project through Science, Technology and Education (grant no.  
26 JSDW202243 to Hai-Bin Shi).

27

28
